# Supplementary material for: Mutational concordance between primary and metastatic melanoma: a next-generation sequencing approach
Source: J Transl Med. 2019 Aug 28;17:289. doi: 10.1186/s12967-019-2039-4 (PMC6712827; doi:10.1186/s12967-019-2039-4)
Supplement: Supplementary file 3 — Additional file 3: Table S3. Gene variant patterns in paired melanoma samples. In gray, cases withconcordant patterns for pathogenic/likely pathogenic variants. [file 12967_2019_2039_MOESM3_ESM.xlsx]

## Sheet: Total paired melanomas
Additional file 3: Table S3. Gene variant patterns in paired melanoma samples. In gray, cases with concordant patterns for pathogenic/likely pathogenic variants
No.	Tumor tissue	Pathogenic/Likely pathogenic variants	Benign/Likely benign variants
01A	primary	BRAFV600E, TP53R196Ter	KIT, TP53
01B	lymph node mtx	BRAFV600E, TP53R196Ter
02A	primary	BRAFV600E, CDKN2AA40V, PIK3CAV344M, TP53P278L	KDR
02B	lymph node mtx	BRAFV600E, CDKN2AA40V, PIK3CAV344M, TP53P278L	KDR
03A	primary	CDKN2AG23S, MAP2K1Q383Ter, PIK3CAV344A, PTENG165R, RB1Q354Ter	KIT, MAP2K1, PIK3CA
03B	lymph node mtx	MAP2K1Q354Ter, TP53V216M	PIK3CA
03C	lymph node mtx
04A	primary	BRAFV600E	PIK3CA, TP53
04B	lymph node mtx	BRAFV600E	PIK3CA, TP53
04C	visceral mtx	BRAFV600E	PIK3CA, TP53
05A	primary	BRAFV600E, PIK3CAT1031I	KIT
05B	visceral mtx	BRAFV600E, MAP2K1Q46Ter, RB1Q354Ter, TP53R158C	NF1
05C	visceral mtx	BRAFV600E	TP53
06A	primary	BRAFV600E	TP53
06B	lymph node mtx	BRAFV600E	TP53
06C	lymph node mtx	BRAFV600E	TP53
06D	visceral mtx
06E	lymph node mtx	BRAFV600E	TP53
07A	primary	BRAFV600E	KDR, KIT, TP53
07B	visceral mtx	BRAFV600E, CCND1G103R, PTENQ110Ter
07C	lymph node mtx	BRAFV600E	KDR, KIT, TP53
08A	primary	BRAFV600E	KDR
08B	lymph node mtx	BRAFV600E	KDR
09A	primary	BRAFG466R, BRAFG469E, BRAFV600E	CDKN2A, KDR
09B	visceral mtx	BRAFV600E, MAP2K1Q110Ter, PTENG127R, TP53E286K	TP53
10A	primary	BRAFV600E	PIK3CA, TP53
10B	visceral mtx	BRAFV600E	PIK3CA, TP53
11A	primary	BRAFV600E	KDR, TP53
11B	lymph node mtx	BRAFV600E	KDR, TP53
12A	primary	BRAFV600K	PIK3CA, TP53
12B	lymph node mtx	BRAFV600K	PIK3CA, TP53
13A	primary	NRASG12D, TP53E286K
13B	visceral mtx		NF1, TP53
14A	primary	BRAFV600E	TP53
14B	lymph node mtx	BRAFV600E	TP53
14C	visceral mtx	BRAFV600E	TP53
16A	primary		KDR
16B	visceral mtx	NRASG12D, NRASQ61R, TP53E286K	KDR
18A	primary		PIK3CA, TP53
18B	lymph node mtx		PIK3CA, TP53
19A	primary	BRAFV600E	KDR, KIT, MET, NF1, TP53
19B	lymph node mtx	BRAFV600E	KDR, KIT, MET, NF1, TP53
20A	primary	CDKN2AR131H, KRASG12D, MAP2K1Q243Ter, NRASQ61R, PIK3CAG1049S, RB1splicesite_5ex18, TP53Q5Ter, TP53R196L	CDKN2A, MAP2K12, RB1
20B	visceral mtx	NRASQ61R	TP53
21A	primary	BRAFV600K	TP53
21B	lymph node mtx	BRAFV600K	TP53
22A	primary	BRAFV600E	KDR, MET, PIK3CA, TP53
22B	lymph node mtx	BRAFV600E	KDR, MET, PIK3CA, TP53
23A	primary	NRASQ61R	KIT, TP53
23B	visceral mtx	NRASQ61R	KIT, TP53
24A	primary		PIK3CA, TP53
24B	lymph node mtx		PIK3CA, TP53
25A	primary		KDR, KIT
25B	visceral mtx		NF1, TP53
26A	primary		KDR, TP53
26B	visceral mtx		KDR, TP53
27A	primary	NRASG12D, TP53P278S	CDKN2A, KIT, NF1, PIK3CA, TP53
27B	lymph node mtx	NRASG12D, TP53P278S	CDKN2A, KIT, PIK3CA
28A	primary		KDR, TP53
28B	visceral mtx		KDR, TP53
29A	primary	BRAFV600E	KDR, NF1, TP53
29B	lymph node mtx	BRAFV600E	TP53
30A	primary	NRASG12D	KDR, PIK3CA
30B	lymph node mtx		KDR, KIT
32A	primary	BRAFV600E	KIT, PIK3CA
32B	lymph node mtx	BRAFV600E	KIT, TP53
34A	primary
34B	lymph node mtx
10-01A	primary	NRASQ61R
10-01B	visceral mtx	NRASQ61R
10-02A	primary	BRAFV600K	TP53
10-02B	lymph node mtx	BRAFV600M	KDR
10-03A	primary	BRAFV600E	PIK3CA
10-03B	lymph node mtx	BRAFV600E	PIK3CA
10-05A	primary	BRAFV600E
10-05B	lymph node mtx	BRAFV600E
10-07A	primary		NF1
10-07B	lymph node mtx		NF1
10-08A	primary
10-08B	lymph node mtx
10-09A	primary
10-09B	visceral mtx
10-10A	primary	BRAFG469S	KIT
10-10B	lymph node mtx	BRAFG469S	KIT
10-11A	primary		KIT, MAP2K1
10-11B	lymph node mtx		KIT, MAP2K1
10-12A	primary	PIK3CAV344A	KIT
10-12B	visceral mtx	TP53V216M
10-13A	primary	NRASQ61R
10-13B	lymph node mtx	NRASQ61R
